# Supplementary material for: Prediction of long-term recurrent ischemic stroke: the added value of non-contrast CT, CT perfusion, and CT angiography
Source: Springer Nature journal article supplement (doi:10.1007/s00234-020-02526-5), 2020-08-28
Supplement: MOESM1 [file 18326514]

## **SUPPLEMENTAL MATERIAL**

### **Supplemental Tables**

**Supplemental Table I.** Patient characteristics stratified by included and excluded centers, which participated in the Dutch acute stroke study (DUST)

| <b>Characteristic</b>                    | <b>Included</b><br>n=638 | <b>Excluded</b><br>n=755 |
|------------------------------------------|--------------------------|--------------------------|
| Age, mean±SD                             | 67±14                    | 67±14                    |
| Male sex, n (%)                          | 365 (57)                 | 431 (57)                 |
| mRS <sub>≥3</sub> before stroke          | 44 (7)                   | 39 (5)                   |
| Admission NIHSS, median (Q1-Q3)          | 6 (3-12)                 | 6 (3-12)                 |
| Intravenous thrombolysis, n (%)          | 390 (61)                 | 479 (63)                 |
| Endovascular treatment, n (%)            | 41 (6)                   | 40 (5)                   |
| <b>Medical history</b>                   |                          |                          |
| Hypertension, n (%)                      | 319 (50)                 | 408 (54)                 |
| Diabetes mellitus, n (%)                 | 84 (13)                  | 129 (17)                 |
| Hyperlipidemia, n (%)                    | 190 (30)                 | 267 (35)                 |
| Smoking currently, n (%)                 | 193 (32)                 | 188 (25)                 |
| Former smoking, n (%)                    | 176 (29)                 | 237 (31)                 |
| Never smoked, n (%)                      | 228 (38)                 | 245 (33)                 |
| Atrial fibrillation, n (%)               | 87 (14)                  | 90 (12)                  |
| Anticoagulant medication, n (%)          | 94 (15)                  | 72 (10)                  |
| History of stroke/TIA, n (%)             | 136 (21)                 | 206 (27)                 |
| History of MI, n (%)                     | 75 (12)                  | 95 (13)                  |
| History of PAD, n (%)                    | 34 (5)                   | 48 (6)                   |
| <b>Imaging findings</b>                  |                          |                          |
| Old infarcts on NCCT, n (%)              | 194 (30)                 | 214 (28)                 |
| Hyperdense vessel sign, n (%)            | 128 (20)                 | 155 (21)                 |
| Early signs of ischemia on NCCT, n (%)   | 173 (27)                 | 170 (23)                 |
| Perfusion deficit present on CTP, n (%)  | 410 (66)                 | 387 (51)                 |
| CBV (pc)ASPECTS, median (Q1-Q3)          | 10 (8-10)                | 10 (8-10)                |
| CBV (pc)ASPECTS ≤7, n (%)                | 148 (24)                 | 138 (18)                 |
| MTT (pc)ASPECTS, median (Q1-Q3)          | 9 (4-10)                 | 9 (5-10)                 |
| MTT (pc)ASPECTS ≤7, n (%)                | 261 (42)                 | 249 (33)                 |
| ICA stenosis >70% or occlusion on CTA    | 137 (22)                 | 108 (14)                 |
| Occlusion on CTA, n (%)                  | 351 (55)                 | 362 (48)                 |
| Clot burden score, median (Q1-Q3)        | 10 (8-10)                | 10 (8-10)                |
| Poor collateral score, n (%)             | 108 (17)                 | 64 (9)                   |
| <b>TOAST classification</b>              |                          |                          |
| LAA, n (%)                               | 203 (32)                 | 217 (29)                 |
| CE, n (%)                                | 119 (19)                 | 116 (15)                 |
| SVD, n (%)                               | 65 (10)                  | 118 (16)                 |
| Other, n (%)                             | 53 (8)                   | 50 (7)                   |
| Unknown, n (%)                           | 198 (31)                 | 254 (34)                 |
| <b>Follow-up</b>                         |                          |                          |
| Poor clinical outcome at 90 days*, n (%) | 254 (40)                 | 247 (33)                 |

\* defined as modified Rankin scale equal or greater than 3

DUST indicates Dutch Acute Stroke Study; SD, standard deviation; mRS, modified Rankin Scale; NIHSS, National Institutes of Health Stroke Scale; TIA, transient ischemic attack; MI, myocardial infarction; PAD, peripheral artery disease; NCCT, non-contrast CT; CBV, cerebral blood volume; ASPECTS, Alberta Stroke Program Early CT Score; MTT, mean transit time; ICA, internal carotid artery.
